# Supplementary material for: The transcription factor LEF1 interacts with NFIX and switches isoforms during adult hippocampal neural stem cell quiescence
Source: Front Cell Dev Biol. 2022 Jul 22;10:912319. doi: 10.3389/fcell.2022.912319 (PMC9355129; doi:10.3389/fcell.2022.912319)
Supplement: Supplementary file 1 [file Table2.XLSX]

## Sheet: GO up Q-NSPC P<0.05 FDR<0.05
GO term	Count	FDR	PValue	Genes
neuron differentiation	64	6.47938e-07	1.29717e-09	NRP2, UCHL1, PAX6, GRIN3A, APP, S1PR1, ANK3, DYNLL2, ILK, SEMA3A, TUBB3, PTPRK, RXRA, MDGA1, LIFR, VAX1, CTNNA1, SLIT1, CDK5, AMIGO1, EFNA5, RELN, NGFR, SLITRK6, KALRN, FGFR3, NNAT, TH, NAPA, ARX, HOXA1, LAMB2, BCL11B, NUMB, GBX2, POU3F2, DCX, OLFM3, SNAP25, NEFL, APC, DFNA5, GNAO1, BHLHE22, DPYSL5, CELSR3, NTNG2, EVL, NEUROG2, PARK2, ISL1, PTPN11, EPHA4, DLX2, DLX1, ULK1, DLX5, ULK2, NTRK2, CHRN…
nucleobase, nucleoside, nucleotide and nucleic acid metabolic process	61	3.21034e-06	1.28543e-08	MEF2C, ANKRD1, MXI1, CBFA2T2, PDCD4, CITED2, EPC1, HTR1B, SUPT5H, KDM5B, AKIRIN2, ATF7IP, SATB1, ZFP423, SATB2, CTBP2, RXRA, ZHX1, ZHX2, HDAC10, LEF1, TLE4, VAX1, FOXN3, NRIP1, MXD4, PURA, CHMP1A, NCOA2, NPPC, MDM2, LRCH4, ZC3H8, ATN1, HEXIM2, LANCL2, PER1, PER3, TCF4, RUNX2, NR1H3, KLF12, VHL, RFX5, KLF11, NDFIP1, SMAD2, DLX2, HDAC4, DLX1, ID2, ID1, YAF2, TRPS1, GSK3B, JAZF1, ID4, HDAC9, HDAC7, …
cell morphogenesis	48	2.02872e-05	1.62462e-07	NRP2, FGFR2, NOG, UCHL1, PAX6, ARX, HOXA1, APP, LAMB2, ANK3, FAT1, BCL11B, NUMB, ILK, GBX2, SEMA3A, DCX, SNAP25, NEFL, APC, RXRA, LIFR, LEF1, NTNG2, CELSR3, EVL, NEUROG2, VAX1, CTNNA1, PCM1, ISL1, SLIT1, CDK5, PTPN11, AMIGO1, EPHA4, ULK1, ID1, ULK2, DLX5, GSK3B, EFNA5, CHRNB2, RELN, NGFR, SLITRK6, KALRN, GRK1
nervous system development	36	6.16696e-05	5.35021e-07	NOG, SYNJ1, PAX6, KIT, TIMP2, ATN1, INPP5J, SEC16A, ILK, NUMB, POU3F2, SEMA3A, SNAP25, NEFL, DIXDC1, PHOX2B, ARHGEF1, PTPRF, SOCS2, VAX1, CTNNA1, ISL1, AMIGO1, DLX2, DLX1, ULK1, ULK2, GSK3B, SIPA1L1, NTRK2, ID4, CHRNB2, PBX1, NGFR, SYNGAP1, KALRN
enzyme linked receptor protein signaling pathway	37	0.0020165	2.35729e-05	FGFR2, RGD69425, NOG, FGFR3, LTBP3, USP9X, BMPR2, GRIK5, KIT, CTGF, PDGFC, PIK3R3, UBE2D1, FRS2, GIGYF1, NR1H3, BCR, SOCS2, ARID5B, MYO1E, WDR6, LIFR, SOCS7, SMAD2, CDK5, PTPN11, EPHA4, DDR1, ID1, NTRK2, JAK1, PPM1L, SMURF2, JAK3, SYNGAP1, BAMBI, TOB1
protein modification by small protein conjugation or removal	21	0.00329498	4.40487e-05	RGD69425, LRSAM1, VHL, USP9X, UCHL1, SOCS7, PARK2, OS9, TRIM33, MGRN1, PIAS3, ATXN7, OTUD7B, MDM2, FBXO32, PAF1, UBE2D1, CHFR, HECTD1, LOC683844, HDAC6
protein kinase cascade	31	0.01531	0.000247071	FGFR2, CAV1, FGFR3, TFG, ZEB2, LPAR1, TIMP2, PDCD4, GPR89, NOD1, MYD88, TMEM9B, ILK, OTUD7B, CAT, APC, DIXDC1, PTPN6, SOCS2, PSAP, LGALS1, NDFIP1, PDE4D, ID1, RIPK1, HIPK3, MAPK8IP2, AKAP7, EDA, SYNGAP1, MAP3K11
pattern specification process	31	0.0162891	0.000284913	DNAH11, NOG, CDX1, TSHZ1, BMPR2, HOXD12, PAX6, ZEB2, CITED2, HOXA1, HOXA5, HOXA6, RAB23, GBX2, AXIN2, FRS2, APC, SATB2, SMAD6, LEF1, SMAD2, PCDH8, NOTCH2, DLX2, DLX1, CRKL, HIPK1, PBX1, RELN, SP8, SYNGAP1
cell adhesion	49	0.0164613	0.000293487	NRP2, DLC1, ASTN1, CTNND2, PCDH24, PCDHB10, DCHS1, IGSF11, APP, LAMB2, GP1BB, CTGF, FAT1, PCDHB16, ILK, ITGB6, SPON2, NEGR1, MLLT4, RASA1, SPON1, PTPRK, HAPLN1, NRXN2, PTPRF, NRXN3, PTPRS, LEF1, CELSR3, PCDH8, CELSR1, NRXN1, CTNNA1, CDK5, BTBD9, BCL2L11, NCAM1, AMIGO1, DDR1, TMEM8B, FBLN5, LSAMP, RELN, EDA, NCAN, NTM, ITGA2B, ADAM15, CDH11
intracellular signaling cascade	84	0.017747	0.000334531	DLC1, ADCY4, PLEKHM1, PINK1, LPAR1, LATS2, NISCH, MYD88, S1PR1, NOD1, CTGF, ARHGAP1, PLCB1, FRS2, DAB2IP, BCR, SOCS2, CRYAB, RXRA, STMN4, SOCS7, ARID1A, PI4KB, KIDINS220, CDK5, DAPK1, RND3, ASB8, CHRM4, NCOA2, SNF1LK2, HIPK1, MED16, SDCBP, PPM1L, GUCY1B3, PDE9A, UNC13B, KALRN, MAP3K11, CALCR, RAB3B, CAV1, RAB3C, FGFR3, ECEL1, KIT, ASB13, ABCA1, CALCOCO1, LOC683719, DGKB, RB1CC1, RHOBTB2, RAB11B, …

## Sheet: GO up A-NSPC P<0.05 FDR<0.05
GO term	Count	FDR	PValue	Genes
DNA replication	25	8.22216e-05	0.000289908	BLM, DBF4, TIPIN, RPA3, CCNE2, TFAM, CCNE1, ORC2L, MCM8, CDC45L, ORC6L, GINS1, NASP, NOL8, GINS4, MCM3, ORC1L, RAD50, NAE1, POLD3, RFC5, RFC3, RFC2, POLD1, HSD11B1
lipid biosynthetic process	41	2.92818e-05	0.00108662	MYO5A, CYP51, MVD, HMGCR, RGD1565459, LSS, GPAT2, ACSS2, CEPT1, ELOVL5, DHCR7, INSIG1, SCARB1, UGT8, PCYT2, ACSL3, HSD17B7, NSDHL, DHCR24, SCD1, EBP, LPL, GLT25D1, GTPBP4, CRLS1, PIGX, ACACA, FADS3, FADS2, ACLY, LPCAT2, PNPLA3, COQ2, LASS4, HSD11B1, LTA4H, IDI1, RNPEP, SC5DL, FABP5, PLA2G5
cholesterol biosynthetic process	11	0.000552769	0.00385363	CYP51, EBP, MVD, HMGCR, DHCR7, INSIG1, LSS, IDI1, HSD17B7, NSDHL, DHCR24
ribonucleoprotein complex biogenesis	30	1.10967e-07	0.0131495	SNRPD1, SNRPD2, DIMT1L, RPS25, RPL7, PRMT7, CLP1, WDR77, BXDC2, WDR12, RPL5, RPL7A, GEMIN6, PRPF31, RPL35A, GTPBP4, RPL26, EXOSC3, RPL24, RGD1565520, RPS7, MRTO4, DDX56, RPS19, RPS17, RPS14, RPS10, TFB1M, PES1, SIP1, SNRPF
ribonucleoprotein complex assembly	13	0.0280904	0.0131495	RPS25, PRPF31, PRMT7, CLP1, RPS14, WDR77, SNRPD1, SNRPD2, RPS10, RPL24, GEMIN6, SIP1, SNRPF
rRNA metabolic process	14	0.0453864	0.0154273	RPL35A, RPL26, EXOSC3, DIMT1L, RPS7, DDX56, RPS19, RPL7, RPS17, RPS14, WDR12, RPL5, PES1, TFB1M
structural constituent of ribosome	52	7.04437e-11	0.0377774	RPL36A, RPL13, RPS3, RPS3A, RPLP1, RPS27A, RPL36AL, RPL35A, RGD1561984, MRPL9, RGD1561635, RPS18, RPS19, LOC680353, RPS17, RPS14, RPS12, RPS13, RPS10, RPS11, MRPS15, RGD1559743, MRPS10, RPL35, RPL27A, RPS15A, RPL37, RPS25, RPS26, RPS27, RPL30, RPL7, RPL31, RPL6, RPL9, RPL8, RPL3, RPL5, RPS20, RPS21, EHD2, RPS23, LOC689919, RPSA, RPL26, RPS9, RPL24, RPS8, RPS7, RGD1565170, LOC680988, RPL23, RPL13A…
ribosome biogenesis	21	8.61432e-05	0.048569	RPL35A, GTPBP4, RPL26, EXOSC3, RPL24, DIMT1L, RGD1565520, MRTO4, RPS7, RPS25, DDX56, RPS19, RPL7, RPS17, RPS14, BXDC2, WDR12, RPL5, RPS10, RPL7A, TFB1M, PES1
RNA binding	50	0.00110835	0.048569	XPO1, ZC3HAV1, MKI67IP, PRKCSH, YBX1, RPS3, LONP1, DDX25, CLP1, RPL35A, CARS, YARS, EXOSC7, EIF1A, CSDA, NCL, HNRPDL, RPS18, RPS14, LOC499339, SNRPB, HSD11B1, RPS13, RPS11, SNRPF, HNRNPLL2, FIP1L1, PUS1, FARS2, PABPC4, RPL37, IGF2BP2, HNRNPA3, RPL7, HNRNPF, RPL9, RPL8, RPL5, RPS20, EHD2, XPOT, PDCD11, RGD1309077, RPS9, TRNT1, RGD1305412, DDX56, EIF4E, RPL22, DDX50, DDX54
structural molecule activity	64	3.5315e-05	0.0486014	RPL36A, RPL13, NELL2, RPS3, RPS3A, RPLP1, TUBB6, TUBA1B, RPS27A, RPL36AL, RPL35A, RGD1561984, MRPL9, RGD1561635, NUPL1, RPS18, RPS19, LOC680353, RPS17, RPS14, RPS12, RPS13, RPS10, RPS11, LAMC1, SPTB, MRPS15, TUBA3B, RGD1559743, RPL35, MRPS10, RPL27A, RPS15A, RPL37, CLDN10, RPS25, RPS26, RPL30, RPS27, RPL7, RPL31, RPL6, RPL9, RPL8, RPL3, RPL5, RPS20, LAMB1, RPS21, EHD2, RPS23, THBS4, LOC689919, RP…

## Sheet: KEGG up Q-NSPC P<0.05
KEGG Term	Count	PValue	Genes
Phosphatidylinositol signaling system	16	7.06566e-06	CDIPT, PIK3C2A, SYNJ1, PI4KB, DGKI, CDS2, DGKB, INPP5K, INPP5J, PLCD4, INPP4A, PLCB1, PIK3R3, PIP4K2C, PIK3R2, CALM1
Endometrial cancer	12	0.000113059	APC2, CASP9, GSK3B, ILK, LEF1, ELK1, FOXO3, CTNNA1, PIK3R3, AXIN2, PIK3R2, APC
Pathways in cancer	34	0.00053875	FGFR2, FGFR3, APC2, FGF14, STK36, FGF11, EGLN2, TFG, KIT, LAMB2, CASP9, DNAJC4, PIK3R3, AXIN2, APC, PIK3R2, FZD8, WNT10A, BCR, CTBP2, VHL, RXRA, CREBBP, LEF1, SMAD2, CTNNA1, DAPK1, CRKL, PIAS3, GSK3B, RASSF1, JAK1, MDM2, ITGA2B
Inositol phosphate metabolism	11	0.000617138	ALDH6A1, CDIPT, INPP5K, PIK3C2A, INPP5J, SYNJ1, PLCD4, INPP4A, PI4KB, PLCB1, PIP4K2C
Ubiquitin mediated proteolysis	17	0.00212616	RGD69425, SYVN1, VHL, BTRC, ANAPC4, UBA7, PARK2, HERC1, UBE2E3, MGRN1, PIAS3, KLHL9, RHOBTB2, MDM2, SMURF2, NEDD4L, UBE2D1
MAPK signaling pathway	28	0.00250304	FGFR2, MEF2C, FGFR3, FGF14, RGD1561394, FGF11, CACNB1, ELK1, CACNB3, PPM1B, RAPGEF2, RASA1, CACNA2D1, CACNG5, CACNA2D3, RPS6KA5, CRKL, DUSP1, RPS6KA2, NTRK2, CACNA1G, MAPK8IP2, PLA2G6, CACNA1D, PLA2G2D, DUSP8, MAP3K12, MAP3K11
Axon guidance	16	0.0057996	PLXNC1, LIMK2, DPYSL5, CDK5, SLIT1, EPHA4, SEMA6D, SEMA4G, GSK3B, PLXNA4A, SEMA4B, SEMA3C, EFNA5, UNC5C, SEMA3A, RASA1
Lysosome	15	0.00675866	ARSB, PSAP, LGMN, HEXB, PPT2, RGD1560755, ATP6V0C, LAMP1, SLC17A5, IDS, NAGA, RGD1564228, AP3D1, NEU1, ATP6V0D1
Insulin signaling pathway	16	0.00825983	PRKAG3, PTPRF, SOCS2, PHKB, PHKA1, ELK1, PDE3B, CRKL, TSC1, GSK3B, PRKAA2, PIK3R3, LIPE, PYGB, PIK3R2, CALM1
Fatty acid metabolism	8	0.00913591	ACADVL, ACOX1, ACADM, CPT2, CYP4A3, ECHS1, HADH, PECI
mTOR signaling pathway	9	0.00996421	TSC1, RPS6KA2, ULK1, ULK2, STRADA, DNAJC4, PRKAA2, PIK3R3, PIK3R2
Regulation of actin cytoskeleton	21	0.0162207	FGFR2, ARHGEF1, FGFR3, APC2, LIMK2, FGF14, SSH3, FGF11, VAV2, PFN2, CHRM4, CRKL, ITGB6, PPP1R12A, PDGFC, PIK3R3, FGD3, PIP4K2C, PIK3R2, APC, ITGA2B
Wnt signaling pathway	16	0.0186244	WNT10A, FZD8, NKD1, CTBP2, APC2, PPP2R5B, BTRC, CREBBP, LEF1, SMAD2, DAAM1, GSK3B, AXIN2, PLCB1, CAMK2A, APC
PPAR signaling pathway	10	0.0194244	ACOX1, ACADM, CPT2, CYP4A3, RXRA, ILK, SCP2, PLTP, ANGPTL4, NR1H3
SNARE interactions in vesicular transport	7	0.019893	STX6, STX5, VAMP7, STX16, BET1L, VAMP2, SNAP25
Arrhythmogenic right ventricular cardiomyopathy (ARVC)	10	0.024827	CACNA2D1, ITGB6, CACNB1, CACNG5, LEF1, CACNB3, CACNA2D3, CTNNA1, CACNA1D, ITGA2B
Basal cell carcinoma	8	0.0252742	FZD8, WNT10A, APC2, STK36, GSK3B, LEF1, AXIN2, APC
Jak-STAT signaling pathway	15	0.0277258	PTPN6, SOCS2, CREBBP, LIFR, IL11RA1, SOCS7, CISH, PTPN11, STAT6, PIAS3, JAK1, JAK3, IL13RA1, PIK3R3, PIK3R2
Neurotrophin signaling pathway	14	0.0279478	FOXO3, KIDINS220, PTPN11, RPS6KA5, CRKL, RPS6KA2, GSK3B, NTRK2, NGFR, PIK3R3, FRS2, CAMK2A, CALM1, PIK3R2
Glycosaminoglycan degradation	5	0.0343446	ARSB, IDS, HEXB, RGD1564228, RGD1560755
Melanogenesis	11	0.0371447	FZD8, ADCY4, WNT10A, GNAO1, GSK3B, CREBBP, LEF1, KIT, PLCB1, CAMK2A, CALM1
Colorectal cancer	10	0.0414162	FZD8, APC2, CASP9, GSK3B, LEF1, SMAD2, PIK3R3, AXIN2, PIK3R2, APC
Renal cell carcinoma	9	0.0427409	CRKL, VHL, CREBBP, EGLN2, DNAJC4, FLCN, PIK3R3, PIK3R2, PTPN11

## Sheet: KEGG up A-NSPC P<0.05
KEGG Term	Count	PValue	Genes
Ribosome	46	1.45552e-33	RPL36A, RPL13, RPL27A, RPL35, RPS15A, RPL37, RPS3, RPS25, RPS26, RPL30, RPS27, RPL7, RPL31, RPS3A, RPL6, RPL9, RPL8, RPLP1, RPL3, RPL5, RPL7A, RPS20, RPS21, EHD2, RPS27A, RPS23, RPL36AL, RPSA, RPL35A, RPL26, RGD1561984, RPS9, RPL24, RPS8, RGD1565520, RPS7, RPS18, LOC680988, RPS19, LOC680353, RPL23, RPL22, RPL13A, RPS17, RPS14, RPL21, RPS12, RGD1562905, RPS13, RPS10, RPS11
Cell cycle	19	0.000627225	E2F1, E2F3, E2F5, CDC14B, DBF4, RBL1, CDC16, CHEK2, MCM3, ORC1L, RBX1, CCNE2, CCNE1, ORC2L, CCNB3, MAD2L1, CDC45L, ORC6L, BUB1B
Spliceosome	14	0.0340898	HNRNPA3, BCAS2, PRPF31, SFRS4, LSM8, LSM6, SNRPB, SNRPD1, SNRPD2, PHF5A, SNRPF, PRPF40A, SNRPG, PRPF38A
Pyrimidine metabolism	13	0.0101925	POLR2H, POLD3, DCTD, UMPS, NME1, CTPS, NT5C3, POLD1, DTYMK, TXNRD1, UCK2, ENTPD1, DUT
Small cell lung cancer	11	0.0300865	CCNE2, E2F1, CCNE1, LAMA4, PTK2, E2F3, COL4A1, PIK3CD, CYCS, LAMC1, LAMB1
Steroid biosynthesis	10	1.7882e-07	CYP51, TM7SF2, SOAT1, EBP, DHCR7, LSS, HSD17B7, SC5DL, NSDHL, DHCR24
Base excision repair	10	0.00037735	POLD3, HMGB1, MUTYH, HMG1L1, RGD1560584, NEIL3, POLD1, TDG, OGG1, PARP1, PARP2, NTHL1, RGD1562312
Aminoacyl-tRNA biosynthesis	10	0.000567384	WARS, YARS, CARS, PARS2, FARS2, LARS, GARS, EPRS, YARS2, MARS
Nucleotide excision repair	8	0.0148453	POLD3, RFC5, RFC3, RFC2, POLD1, CETN2, RBX1, RPA3
Mismatch repair	7	0.00166951	POLD3, RFC5, RFC3, MSH3, RFC2, POLD1, RPA3
DNA replication	7	0.0184929	POLD3, RFC5, RFC3, RFC2, POLD1, MCM3, RPA3
Homologous recombination	6	0.019308	POLD3, BLM, POLD1, RAD54L, RAD50, RPA3
